# Supplementary material for: CXCL5 Promotes Acetaminophen-Induced Hepatotoxicity by Activating Kupffer Cells
Source: MDPI journal article supplement (doi:10.3390/ijms241512180), 2023-07-29
Supplement: s1 [file s1]

**A**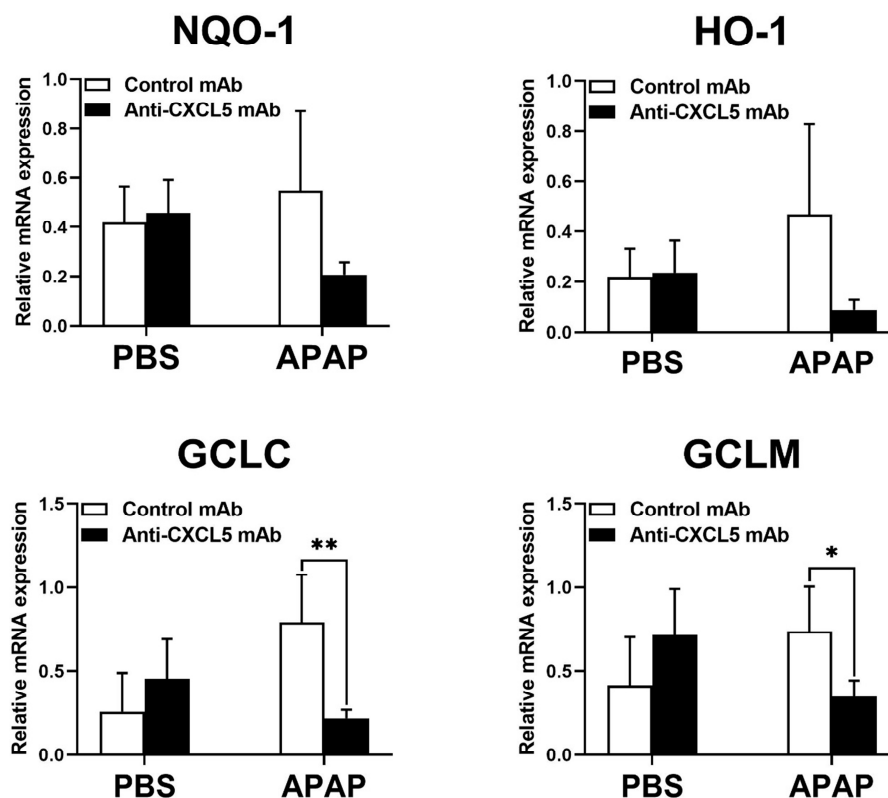

**Figure S1.** Anti-CXCL5 mAb treatment decreased the mRNA expression levels of Nrf2-target genes in mice with APAP administration. (A) The hepatic mRNA expression levels of NQO-1, HO-1, GCLC, and GCLM were detected. The data are expressed as mean  $\pm$  SD per group ( $n = 5$  per group). \*  $p < 0.05$  and \*\*  $p < 0.01$ .
